# Supplementary material for: WRKY22 Transcription Factor from Iris laevigata Regulates Flowering Time and Abiotic Stress Resistance
Source: Preprints.org preprint supplement (doi:10.20944/preprints202310.0502.v1), 2023-10-09
Supplement: Supplementary file 2 [file supplementary]

## *Supplementary Material*

**Table S1.** Primer sequence and application

| Name                   | Forward / Reverse primer<br>sequence (5'-3')        | Temperature/°C | Application                                     |
|------------------------|-----------------------------------------------------|----------------|-------------------------------------------------|
| <i>IIWRKY22</i>        | F:CTCCCAACAACTCTCT<br>CCCTAG                        | 56°C           | PCR<br>amplification<br>reaction                |
| <i>IIWRKY22</i>        | R:CAACAAAATAATCAGCT<br>TGCCCC                       |                |                                                 |
| <i>Actin</i>           | F:CTCCTTTGTTGCTGTTGA<br>CTAC                        | 60°C           | Fluorescence<br>quantitative<br>reference genes |
| <i>Actin</i>           | R:GCACAATGTTACCGTAC<br>AGATC                        |                |                                                 |
| <i>IIWRKY22</i>        | F:GATTGGAGTTGAGATGG<br>GCTT                         | 56°C           | Fluorescence<br>quantitative PCR<br>reaction    |
| <i>IIWRKY22</i>        | R:ACTGTATAGTGGTGCTG<br>AGGC                         |                |                                                 |
| <i>IIWRKY22</i> -BamHI | F:TTGATACATATGCCCCGT<br>CGACTTCTCTCCATCCCCT<br>CTTT | 60°C           | PCR<br>amplification<br>reaction                |
| <i>IIWRKY22</i> -SalI  | R:CCCTTGCTCACCATGGA<br>TCCGCTCCCACCACCGGC<br>AACGG  |                |                                                 |
| <i>CO</i>              | F:CACAGGTGAATACAGTC<br>AACACC                       | 60°C           | Fluorescence<br>quantification                  |
| <i>CO</i>              | R:CCATGGATGAAATGTAT<br>GCGTTATGG                    |                |                                                 |
| <i>GA20OX1</i>         | F:CGGTTTTGCGACGACAT<br>GAG                          | 60°C           | Fluorescence<br>quantification                  |
| <i>GA20OX1</i>         | R:TAGCCCCAGAAGCTCCA                                 |                |                                                 |

|             | TGA                           |      |                                |
|-------------|-------------------------------|------|--------------------------------|
| <i>VRN1</i> | F:CTGAGGGTCCCAGATAA<br>GTTTG  | 60°C | Fluorescence<br>quantification |
| <i>VRN1</i> | R:GTCAGCTTTCCTTAGTCC<br>TACAC |      |                                |
| <i>SPL3</i> | F:CTCATGTTCGGATCTCTG<br>GTC   | 60°C | Fluorescence<br>quantification |
| <i>SPL3</i> | R:TTTCCGCCTTCTCTCGTT<br>GTG   |      |                                |
| <i>FCA</i>  | F:GCTCTTGTCGCAGCAAA<br>CTC    | 60°C | Fluorescence<br>quantification |
| <i>FCA</i>  | R;GATCCAGCCCACTGTTG<br>TTTAC  |      |                                |
| <i>SVP</i>  | F:GAAGAGAACGAGCGACT<br>TGG    | 60°C | Fluorescence<br>quantification |
| <i>SVP</i>  | R:GAGCTCTCGGAGTCAAC<br>AGG    |      |                                |
| <i>FT</i>   | F:GGAACAACCTTTGGCAA<br>TGAGAT | 60°C | Fluorescence<br>quantification |
| <i>FT</i>   | R:CTGCCAAGCTGTCGAAA<br>CAA    |      |                                |
| <i>SOC1</i> | F:GATCGAGTCAGCACCAA<br>ACC    | 60°C | Fluorescence<br>quantification |
| <i>SOC1</i> | R:TCCTATGCCTTCTCCCAA<br>GA    |      |                                |
| <i>TPS1</i> | F:ATTGGCATAGATTCTGA<br>TCGGT  | 60°C | Fluorescence<br>quantification |
| <i>TPS1</i> | R:TCAAGACGATCAACACC           |      |                                |

|                |                                   |      |                                              |
|----------------|-----------------------------------|------|----------------------------------------------|
|                | TAACA                             |      |                                              |
| <i>NtHAK1</i>  | F:ATCCACACCGAGCTTGT<br>TTCAGGA    | 60°C | Fluorescence<br>quantitative PCR<br>reaction |
| <i>NtHAK1</i>  | R:TGGGTCCAATTCTTCCC<br>ACCAAGA    |      |                                              |
| <i>NtSOS1</i>  | F:GCGTGCTTATTTCCACCT<br>TTTG      | 60°C | Fluorescence<br>quantitative PCR<br>reaction |
| <i>NtSOS1</i>  | R:TTTGATGACGGCTCCCC<br>AGT        |      |                                              |
| <i>NtPMA4</i>  | F:TTTCCCGAGCACAAGTA<br>TGA        | 60°C | Fluorescence<br>quantitative PCR<br>reaction |
| <i>NtPMA4</i>  | R:GGTAACCTCCAAGAACA<br>ACAC       |      |                                              |
| <i>NtSOD</i>   | F:CTCCTACCGTCGCCAAA<br>T          | 60°C | Fluorescence<br>quantitative PCR<br>reaction |
| <i>NtSOD</i>   | R:GCCCCAACCAAGAGAACC<br>C         |      |                                              |
| <i>NtCAT</i>   | F:AGGTACCGCTCATTAC<br>ACC         | 60°C | Fluorescence<br>quantitative PCR<br>reaction |
| <i>NtCAT</i>   | R:AAGCAAGCTTTTGACCC<br>AGA        |      |                                              |
| <i>NtPOD</i>   | F:CCTCAGCTTCAAGCATT<br>ATGTCCA    | 60°C | Fluorescence<br>quantitative PCR<br>reaction |
| <i>NtPOD</i>   | R:ACCTTTGTAGAAGCATC<br>GGTCCAC    |      |                                              |
| <i>NtActin</i> | F:CGGAATCCACGAGACTA<br>ACATAACAAC | 60°C | Fluorescence<br>quantitative PCR<br>reaction |
| <i>NtActin</i> | R:GGTGCTGAGGGAAGCCA<br>AGATA      |      |                                              |

**Table S2.** Functional prediction of WRKY transcription factor family members in *I. lavigata*

| Group | <i>A. thaliana</i> | <i>I. laevigata</i> | Function                                                                                                                                                                                               |
|-------|--------------------|---------------------|--------------------------------------------------------------------------------------------------------------------------------------------------------------------------------------------------------|
| I     |                    | isoform 3308        | They are involved in disease resistance, abiotic stress (salt, cold, heat) , senescence and some developmental processes (pollen development, seed coat development) . A response to a light stimulus. |
|       |                    | isoform 275946      |                                                                                                                                                                                                        |
|       |                    | isoform 813581      |                                                                                                                                                                                                        |
|       |                    | isoform 336911      |                                                                                                                                                                                                        |
|       |                    | isoform 460429      |                                                                                                                                                                                                        |
|       |                    | isoform 71297       |                                                                                                                                                                                                        |
|       | <i>AtWRKY1</i>     | isoform 722579      |                                                                                                                                                                                                        |
|       | <i>AtWRKY2</i>     | isoform 629169      |                                                                                                                                                                                                        |
|       | <i>AtWRKY3</i>     | isoform 239732      |                                                                                                                                                                                                        |
|       | <i>AtWRKY4</i>     | isoform 238068      |                                                                                                                                                                                                        |
|       | <i>AtWRKY25</i>    | isoform 687755      |                                                                                                                                                                                                        |
|       | <i>AtWRKY26</i>    | isoform 416995      |                                                                                                                                                                                                        |
|       | <i>AtWRKY32</i>    | isoform 342824      |                                                                                                                                                                                                        |
|       | <i>AtWRKY33</i>    | isoform 439137      |                                                                                                                                                                                                        |
|       | <i>AtWRKY34</i>    | isoform 312565      |                                                                                                                                                                                                        |
|       | <i>AtWRKY44</i>    | isoform 658241      |                                                                                                                                                                                                        |
|       | <i>AtWRKY58</i>    | isoform 7202        |                                                                                                                                                                                                        |
|       |                    | isoform 6445        |                                                                                                                                                                                                        |
|       |                    | isoform 232908      |                                                                                                                                                                                                        |
|       |                    | isoform 564486      |                                                                                                                                                                                                        |
|       |                    | isoform 298714      |                                                                                                                                                                                                        |
|       |                    | isoform 319525      |                                                                                                                                                                                                        |

| Group | <i>A. thaliana</i> | <i>I. laevigata</i> | Function                                                                                                                                                                                                                          |
|-------|--------------------|---------------------|-----------------------------------------------------------------------------------------------------------------------------------------------------------------------------------------------------------------------------------|
| IIa   |                    | isoform 49561       | A defensive response to bacteria or fungi.                                                                                                                                                                                        |
|       |                    | isoform 305653      |                                                                                                                                                                                                                                   |
|       | <i>AtWRKY40</i>    | isoform 347489      |                                                                                                                                                                                                                                   |
|       | <i>AtWRKY60</i>    | isoform 63513       |                                                                                                                                                                                                                                   |
|       |                    | isoform 684413      |                                                                                                                                                                                                                                   |
| IIb   | <i>AtWRKY6</i>     |                     | Defense responses to bacteria, fungi, oxidative stress; expression of genes involved in cold, leaf senescence. Root development.                                                                                                  |
|       | <i>AtWRKY9</i>     | isoform 358692      |                                                                                                                                                                                                                                   |
|       |                    | isoform 56218       |                                                                                                                                                                                                                                   |
|       | <i>AtWRKY31</i>    | isoform 320236      |                                                                                                                                                                                                                                   |
|       | <i>AtWRKY36</i>    | isoform 40279       |                                                                                                                                                                                                                                   |
|       | <i>AtWRKY42</i>    | isoform 478449      |                                                                                                                                                                                                                                   |
|       | <i>AtWRKY47</i>    | isoform 303256      |                                                                                                                                                                                                                                   |
|       | <i>AtWRKY72</i>    | isoform 14002       |                                                                                                                                                                                                                                   |
| IIc   | <i>AtWRKY8</i>     |                     | They are involved in disease resistance (bacteria, fungi) , abiotic stress (salt, cadmium, drought) , senescence and some developmental processes (lignin synthesis, pollen development, florescence regulation) Auxin transport. |
|       | <i>AtWRKY12</i>    |                     |                                                                                                                                                                                                                                   |
|       | <i>AtWRKY13</i>    |                     |                                                                                                                                                                                                                                   |
|       | <i>AtWRKY23</i>    |                     |                                                                                                                                                                                                                                   |
|       | <i>AtWRKY24</i>    | isoform 735698      |                                                                                                                                                                                                                                   |
|       | <i>AtWRKY28</i>    |                     |                                                                                                                                                                                                                                   |
|       | <i>AtWRKY43</i>    |                     |                                                                                                                                                                                                                                   |
|       | <i>AtWRKY48</i>    |                     |                                                                                                                                                                                                                                   |

| Group | <i>A. thaliana</i> | <i>I. laevigata</i> | Function                                                                                                                                                                                                                                                                                               |
|-------|--------------------|---------------------|--------------------------------------------------------------------------------------------------------------------------------------------------------------------------------------------------------------------------------------------------------------------------------------------------------|
| IId   | <i>AtWRKY49</i>    |                     |                                                                                                                                                                                                                                                                                                        |
|       | <i>AtWRKY50</i>    |                     |                                                                                                                                                                                                                                                                                                        |
|       | <i>AtWRKY51</i>    |                     |                                                                                                                                                                                                                                                                                                        |
|       | <i>AtWRKY56</i>    |                     |                                                                                                                                                                                                                                                                                                        |
|       | <i>AtWRKY57</i>    |                     |                                                                                                                                                                                                                                                                                                        |
|       | <i>AtWRKY59</i>    |                     |                                                                                                                                                                                                                                                                                                        |
|       | <i>AtWRKY71</i>    |                     |                                                                                                                                                                                                                                                                                                        |
|       | <i>AtWRKY75</i>    |                     |                                                                                                                                                                                                                                                                                                        |
|       |                    | isoform 352866      |                                                                                                                                                                                                                                                                                                        |
|       |                    | isoform 287969      |                                                                                                                                                                                                                                                                                                        |
|       |                    | isoform 241617      | They are involved in plant disease resistance (bacteria, fungi) , senescence (apoptosis) and some developmental processes (flower development, florescence regulation) , regulation of jasmonic acid signaling pathway, response to light stimulation, calmodulin binding, reaction of salicylic acid. |
|       |                    | isoform 279981      |                                                                                                                                                                                                                                                                                                        |
|       | <i>AtWRKY7</i>     | isoform 327411      |                                                                                                                                                                                                                                                                                                        |
|       | <i>AtWRKY11</i>    | isoform 297487      |                                                                                                                                                                                                                                                                                                        |
|       | <i>AtWRKY15</i>    | isoform 410198      |                                                                                                                                                                                                                                                                                                        |
|       | <i>AtWRKY21</i>    | isoform 41879       |                                                                                                                                                                                                                                                                                                        |
|       | <i>AtWRKY39</i>    | isoform 567039      |                                                                                                                                                                                                                                                                                                        |
|       | <i>AtWRKY74</i>    | isoform 513126      |                                                                                                                                                                                                                                                                                                        |
|       |                    | isoform 286734      |                                                                                                                                                                                                                                                                                                        |
|       |                    | isoform 305537      |                                                                                                                                                                                                                                                                                                        |
|       |                    | isoform 596689      |                                                                                                                                                                                                                                                                                                        |
| IIe   | <i>AtWRKY14</i>    | isoform 561421      | They are involved in disease resistance (bacteria) ,                                                                                                                                                                                                                                                   |

| Group | <i>A. thaliana</i> | <i>I. laevigata</i> | Function                                                                                                                                                                                                                                                                                                                                                         |
|-------|--------------------|---------------------|------------------------------------------------------------------------------------------------------------------------------------------------------------------------------------------------------------------------------------------------------------------------------------------------------------------------------------------------------------------|
| III   | <i>AtWRKY16</i>    | isoform 494831      | senescence and some developmental processes (epidermis development, flower development, plant organ and root morphogenesis, florescence regulation) , auxin transport.                                                                                                                                                                                           |
|       | <i>AtWRKY22</i>    | isoform 588901      |                                                                                                                                                                                                                                                                                                                                                                  |
|       | <i>AtWRKY27</i>    | isoform 420051      |                                                                                                                                                                                                                                                                                                                                                                  |
|       | <i>AtWRKY29</i>    | isoform 234765      |                                                                                                                                                                                                                                                                                                                                                                  |
|       | <i>AtWRKY35</i>    | isoform 635473      |                                                                                                                                                                                                                                                                                                                                                                  |
|       |                    | isoform 51755       |                                                                                                                                                                                                                                                                                                                                                                  |
|       |                    | isoform 422731      | Involved in plant disease resistance (bacteria, fungi) , abiotic stress (ozone, temperature, drought) , senescence and some developmental processes (lateral root development, leaf development) ; response to salicylic acid, regulation of abscisic acid signaling pathway. Regulates Brassinosteroid, ethylene and jasmonic acid-mediated signaling pathways. |
|       | <i>AtWRKY30</i>    | isoform 507977      |                                                                                                                                                                                                                                                                                                                                                                  |
|       | <i>AtWRKY38</i>    | isoform 31149       |                                                                                                                                                                                                                                                                                                                                                                  |
|       | <i>AtWRKY41</i>    | isoform 614906      |                                                                                                                                                                                                                                                                                                                                                                  |
|       | <i>AtWRKY46</i>    | isoform 69705       |                                                                                                                                                                                                                                                                                                                                                                  |
|       | <i>AtWRKY53</i>    | isoform 38178       |                                                                                                                                                                                                                                                                                                                                                                  |
|       | <i>AtWRKY54</i>    | isoform 487979      |                                                                                                                                                                                                                                                                                                                                                                  |
|       | <i>AtWRKY55</i>    | isoform 645693      |                                                                                                                                                                                                                                                                                                                                                                  |
|       | <i>AtWRKY63</i>    | isoform 629546      |                                                                                                                                                                                                                                                                                                                                                                  |
|       | <i>AtWRKY64</i>    | isoform 44179       |                                                                                                                                                                                                                                                                                                                                                                  |
|       | <i>AtWRKY66</i>    | isoform 481801      |                                                                                                                                                                                                                                                                                                                                                                  |
|       | <i>AtWRKY70</i>    | isoform 20352       |                                                                                                                                                                                                                                                                                                                                                                  |
