# Supplementary figures and images for: WRKY22 Transcription Factor from Iris laevigata Regulates Flowering Time and Abiotic Stress Resistance
Source: Preprints.org preprint supplement (doi:10.20944/preprints202310.0502.v1), 2023-10-09

# **Supplemental Figures**

Supplemental Figure 1.

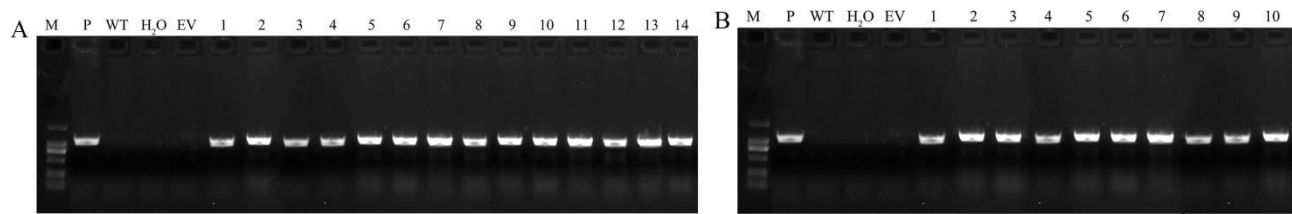

Supplemental Figure 2.

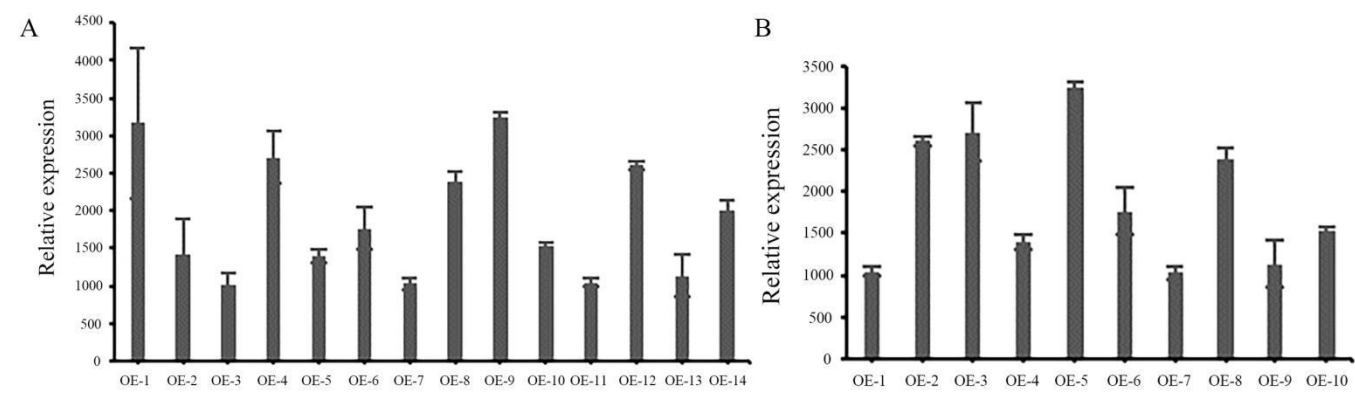

Supplement: Supplementary file 1 [file supplementary]
